# Supplementary material for: Alleviation of dextran sulfate sodium (DSS)-induced colitis in mice through the antioxidative effects of muscone via the MyD88/p38 MAPK signalling pathway
Source: PeerJ journal article supplement (doi:10.7717/peerj.19397), 2025-05-28
Supplement: Raw_data.zip [file Supplementary files tables_Raw_data - 1224.xlsx]

## Sheet: Score of stool consistency
Days	Variable	Value	SD
1	Mod	0	0
1	Mus	0	0
1	Ctrl	0	0
2	Mod	1.92308	0.108786
2	Mus	1.04091	0.199276
2	Ctrl	0.248485	0.162849
3	Mod	1.78571	0.101015
3	Mus	1.5548	0.532072
3	Ctrl	0.03125	0.0441942
4	Mod	1.2	0.282843
4	Mus	1.26794	0.00676657
4	Ctrl	0.0862069	0.121915
5	Mod	1.72222	1.2178
5	Mus	1.97222	0.0392837
5	Ctrl	0.227273	0.321412
6	Mod	2.15	0.212132
6	Mus	2	0
6	Ctrl	0.391544	0.111785
7	Mod	2	0
7	Mus	2.04924	0.18749
7	Ctrl	0.0689655	0.097532
8	Mod	2	0
8	Mus	2	0
8	Ctrl	0.0769231	0.108786
9	Mod	2	0
9	Mus	2	0
9	Ctrl	0.210145	0.174215
10	Mod	2	0
10	Mus	2	0
10	Ctrl	0	0
11	Mod	2	0
11	Mus	2.125	0.176777
11	Ctrl	0.0769231	0.108786
12	Mod	1.75	0.353553
12	Mus	1.91667	0.117851
12	Ctrl	0.0714286	0.101015
13	Mod	2	0
13	Mus	2	0
13	Ctrl	0	0
14	Mod	2.17647	0.249567
14	Mus	2.55882	0.623918
14	Ctrl	0.0434783	0.0614875
15	Mod	2	0
15	Mus	2	0
15	Ctrl	0.107143	0.151523
16	Mod	2	0
16	Mus	1.95455	0.0642824
16	Ctrl	0.0333333	0.0471405

## Sheet: Score of body weight loss
Days	Variable	Value	SD
1	Mod	0	0
1	Mus	0	0
1	Ctrl	0	0
2	Mod	0.38	0.52
2	Mus	0.36	0.5
2	Ctrl	0.58	0.41
4	Mod	0.13	0.35
4	Mus	0.09	0.3
4	Ctrl	0.16	0.38
6	Mod	0.38	0.35
6	Mus	0.36	0.5
6	Ctrl	0.25	0.45
8	Mod	1.88	0.64
8	Mus	2	0.77
8	Ctrl	0.08	0.29
10	Mod	3	0
10	Mus	3	0
10	Ctrl	0.17	0.39
12	Mod	2.63	0.74
12	Mus	2.73	0.65
12	Ctrl	0.33	0.49
14	Mod	2.37	1.06
14	Mus	2.55	0.69
14	Ctrl	0.17	0.39
16	Mod	1.75	0.89
16	Mus	1.82	0.87
16	Ctrl	0.08	0.29

## Sheet: Score of gross bleeding
Days	Variable	Value	SD
1	Mod	0	0
1	Mus	0	0
1	Ctrl	0	0
2	Mod	0	0
2	Mus	0	0
2	Ctrl	0	0
3	Mod	0	0
3	Mus	0	0
3	Ctrl	0	0
4	Mod	0	0
4	Mus	0	0
4	Ctrl	0	0
5	Mod	1.625	0.517549
5	Mus	1	0
5	Ctrl	0	0
6	Mod	2.06964	0.46291
6	Mus	2	0
6	Ctrl	0	0
7	Mod	2.51429	0.522233
7	Mus	2.5	0.527046
7	Ctrl	0	0
8	Mod	2.54167	0.534522
8	Mus	2.33333	0.57735
8	Ctrl	0	0
9	Mod	2	0.51
9	Mus	1	0.47
9	Ctrl	0	0
10	Mod	1.5	0.46
10	Mus	1	0
10	Ctrl	0	0
11	Mod	1	0
11	Mus	1	0
11	Ctrl	0	0
12	Mod	0	0
12	Mus	0	0
12	Ctrl	0	0
13	Mod	0	0
13	Mus	0	0
13	Ctrl	0	0
14	Mod	0	0
14	Mus	0	0
14	Ctrl	0	0
15	Mod	0	0
15	Mus	0	0
15	Ctrl	0	0
16	Mod	0	0
16	Mus	0	0
16	Ctrl	0	0

## Sheet: Histopathological damages
Samples	Groups	Epithelial cells	Inflammatory infiltration	Means	SD
101	1	1	1	0.25	0.25
102	1	0	0
203	1	0	0
205	1	0	0
301	2	0	2	0.5	0.48
302	2	1	1
401	2	0	0
402	2	0	0
701	4	2	2	2	0.71
702	4	2	1
801	4	2	1
802	4	2	4

## Sheet: Colon length
Groups	No.	Colon length	Group number
MOD	102	6.2	1
	103	6.5	1
	104	6.7	1
	105	6.6	1
	106	6.7	1
	107	6.1	1
	204	5.2	1
	205	6.4	1
MUS	301	7.4	2
	304	6.2	2
	307	6.5	2
	401	6.7	2
	403	6.5	2
	404	7.4	2
	406	6.6	2
CtrL	901	7.6	3
	902	8.2	3
	903	6.7	3
	904	8.5	3
	905	8.5	3
	906	7.8	3
	1001	7.4	3
	1002	7.5	3
	1003	7.5	3
	1004	8.2	3
	1005	8.7	3
	1006	7.4	3

## Sheet: Survival curve
No.	Group	Time	Status	Sex	1=male, 2=female
1	Mod	13	2	1	1=alive，2=die
2	Mod	16	1	1
3	Mod	16	1	1
4	Mod	16	1	1
5	Mod	16	1	1
6	Mod	16	1	1
7	Mod	16	1	1
8	Mod	12	2	2
9	Mod	11	2	2
10	Mod	16	1	2
11	Mod	16	1	2
12	Mod	16	1	2
13	Mod	2	2	2
14	Mus	16	1	1
15	Mus	16	1	1
16	Mus	16	1	1
17	Mus	16	1	1
18	Mus	12	2	1
19	Mus	13	2	1
20	Mus	16	1	1
21	Mus	16	1	2
22	Mus	16	1	2
23	Mus	16	1	2
24	Mus	16	1	2
25	Mus	16	1	2
26	Mus	16	1	2
27	CtrL	16	1	1
28	CtrL	16	1	1
29	CtrL	16	1	1
30	CtrL	16	1	1
31	CtrL	16	1	1
32	CtrL	16	1	1
33	CtrL	16	1	2
34	CtrL	16	1	2
35	CtrL	16	1	2
36	CtrL	16	1	2
37	CtrL	16	1	2
38	CtrL	16	1	2

## Sheet: ELISA data (1)
Groups	IL17	IL4	IL33	IL10	GSHPX	Keap1	Nrf2	NQO1	HO1	NOX1	NOX2
Ctrl	49.7836	275.154	107.809	606.261	223.595	434.438	1529.56	29.9172	0.107717	65.9214	56.8813
Ctrl	63.3386	207.159	141.068	597.7	269.607	282.565	1478.42	26.5882	0.11174	43.3662	81.8406
Ctrl	59.0484	230.366	185.444	609.196	317.017	389.402	1924.99	26.0933	0.101072	62.1356	60.364
Ctrl	45.9934	206.816	131.552	728.071	210.586	392.032	1921.25	26.262	0.101072	68.5914	65.9363
Ctrl	60.7066	269.331	119.775	732.474	294.871	382.827	1319.99	33.4373	0.0855692	67.2763	84.975
Ctrl	55.9426	267.704	159.252	714.129	267.457	400.086	1294.42	30.3558	0.0988207	49.0647	98.6736
Ctrl	39.5186	223.858	171.877	692.604	315.512	422.275	1502.74	34.3933	0.111371	53.9663	78.4159
Ctrl	44.1773	223.002	135.321	816.861	224.025	349.954	1380.49	34.7644	0.0820626	55.64	97.2225
Ctrl	45.9145	235.162	156.802	860.644	278.315	344.859	1624.99	33.2461	0.0832438	65.4831	73.7143
Ctrl	38.1236	211.698	120.434	755.222	309.599	420.631	1649.31	30.7831	0.0988207	55.7994	66.1104
MusS	68.6817	186.435	215.499	523.342	288.098	414.221	1406.06	23.7315	0.0923242	48.3076	73.1339
MusS	61.6278	236.704	183.277	708.748	247.568	517.278	1402.32	20.7512	0.0917705	65.4034	75.9781
MusS	54.2581	210.07	173.855	504.752	282.185	489.664	1671.77	16.7474	0.0849048	90.3098	105.929
MusS	51.3365	217.007	217.572	708.014	211.769	509.388	1088.6	26.8918	0.0934315	80.3073	91.36
MusS	75.9198	224.372	143.518	510.867	199.836	531.742	1305.02	25.5985	0.0647139	70.026	85.3233
MusS	56.7848	198.167	138.053	726.604	218.219	330.559	876.534	21.6397	0.0746802	86.1653	112.546
MusS	64.6283	225.399	222.942	545.6	220.584	457.778	1033.09	16.6912	0.0681467	75.9238	78.2418
MusS	69.7345	203.99	152.845	530.191	212.414	401.729	952.003	17.0736	0.0995589	86.6435	116.203
MusS	51.5734	262.737	175.363	696.273	235.743	360.803	1132.26	18.9967	0.0673716	96.7655	141.917
MusS	69.287	190.545	203.157	650.533	236.71	444.135	816.034	17.9171	0.0696601	85.8465	72.3793
Mod	77.6043	212.982	275.138	476.379	146.621	554.753	1458.46	20.8412	0.0807707	126.613	173.493
Mod	83.8159	193.971	184.784	640.994	176.722	438.054	985.06	16.1514	0.0743479	87.0819	135.764
Mod	63.7071	184.808	229.066	441.401	178.012	458.106	1475.92	19.0642	0.0538248	120.676	149.463
Mod	56.39	225.314	204.852	504.997	228.97	629.21	1272.59	23.3267	0.0687742	120.038	138.957
Mod	73.393	162.713	268.354	494.968	239.935	555.575	1142.86	22.9443	0.0767472	128.446	145.226
Mod	74.0247	154.064	261.194	466.106	211.124	540.124	813.539	15.1054	0.0603583	108.84	143.542
Mod	67.5762	165.796	275.138	472.71	242.946	491.144	1334.34	18.097	0.059214	101.229	124.736
Mod	67.5236	165.282	259.404	649.555	161.349	462.544	1266.35	22.5282	0.0685158	88.0781	154.513
Mod	87.5008	140.533	269.014	507.932	158.876	460.736	831.627	15.1167	0.0682574	107.087	170.069
Mod	68.6553	150.553	272.311	623.627	193.386	437.397	917.699	15.0155	0.0675561	123.664	135.59

## Sheet: ELISA data (2)
Group	Claudin1	Occludin	ZO1	MUC2	IL1β	IL6	TNFα	COX2	iNOS	SOD	CAT	MPO	p38MAPK	pp38	Casp3	pERK	ERK	TLR4	MyD88	NFKB
Mod	1382.49	9.07599	143.479	11.9058	218.772	212.11	496.463	102.88	27.7284	76.258	1214.55	4046.9	1836.86	956.564	0.109076	3226.11	5321.77	31.5046	3208.67	5808.69
Mod	1268.34	7.50675	191.935	8.98965	169.723	140.556	509.431	98.8604	31.4703	132.362	1221.02	3132.41	1393.95	1056.08	0.0982253	2629.21	6894.96	31.8246	3154.9	6231.35
Mod	1912.01	8.19191	192.148	10.9513	156.489	153.308	447.114	65.8957	27.4896	70.3041	1235.58	3993.7	1893.9	1392.55	0.0928001	2225.36	5535.05	23.8708	4577.14	5841.54
Mod	1322.25	8.7312	179.475	11.1816	169.889	203.136	516.995	88.8995	33.0758	101.848	1120.71	3368.95	1724.53	1164.61	0.108431	2099.99	4742.18	25.9513	3912.85	6809.5
Mod	1463.03	9.46941	182.99	12.5677	208.764	175.27	497.544	94.7509	36.34	74.655	977.248	3983.52	1488.81	964.147	0.103006	2949.85	7356.63	30.1763	3526.07	6873.01
Mod	1798.5	7.00724	210.892	11.4166	179.401	209.512	493.221	97.7883	33.6729	78.5479	794.416	3037.34	1652.95	1293.98	0.0970167	2785.65	4920.32	32.0167	3179.18	6441.59
Mod	1429.42	8.47924	174.683	10.7931	236.638	198.256	523.479	79.8766	31.0191	71.3345	724.843	3911.08	1831.63	1010.59	0.113454	2973.15	7569.91	38.7062	3604.12	5432.01
Mod	1538.49	9.46499	169.251	8.87934	165.836	228.483	462.964	95.4656	30.4618	84.7881	805.742	3811.49	1973.64	1287.35	0.103382	2731.28	4759.74	26.7355	4152.2	6198.5
Mus	2047.72	12.3559	245.717	11.2727	140.774	163.305	306.272	78.8939	32.9166	113.012	941.113	3510.43	1426.54	984.051	0.0886372	3259.39	6601.4	23.4547	3281.51	5948.84
Mus	1483.95	12.3604	247.528	9.80502	163.768	202.979	348.056	77.1966	32.983	136.713	1240.98	2432.96	1695.43	1202.99	0.0995414	2918.78	5580.21	36.5297	2906.88	7116.1
Mus	2055.33	10.6408	128.036	7.2342	132.834	119.066	216.219	86.6214	23.6814	123.946	1424.89	2794	1736.17	911.544	0.109291	2761.24	8119.39	32.4968	2851.37	6467.87
Mus	1789.62	11.4321	200.455	12.2368	183.95	137.643	309.874	56.7835	35.4377	147.247	1328.35	2520.11	1362.52	867.472	0.0838297	3540.09	6240.1	29.136	3104.6	6772.27
Mus	1642.49	8.13444	193.426	11.4646	188.416	185.897	411.453	72.9978	21.9033	132.591	1066.78	2790.61	1273.47	1074.09	0.0861931	3170.64	8192.16	35.7775	2317.17	4564.79
Mus	1789.62	10.6452	248.167	10.1791	146.564	189.833	407.131	54.3715	21.5451	145.987	1443.76	2520.11	1371.83	947.56	0.104376	2801.18	7233.69	26.6235	3024.82	6824.83
Mus	1560.69	8.7975	157.537	11.9634	163.603	149.372	452.878	51.4681	20.948	150.338	1119.63	2848.33	1609.29	1321.94	0.0844205	3227.22	7153.4	25.9033	2528.77	6264.2
Mus	1628.54	12.7803	172.659	7.27737	156.076	139.769	250.439	85.0581	31.2049	123.717	870.461	2892.47	1796.7	931.922	0.0974196	3014.2	8257.39	22.8146	2872.19	4856.05
Ctrl	2314.7	10.159	268.401	4.84084	123.322	159.448	487.458	72.7298	17.5909	155.09	1430.28	2652.53	1169.28	688.338	0.0692997	3077.44	7022.93	13.7885	1985.89	3881.52
Ctrl	1769.96	11.6398	249.125	8.4045	157.482	120.719	339.411	48.6093	18.5595	144.842	1206.46	2882.28	1012.72	919.6	0.0708037	4038.25	9416.59	22.4945	3458.43	4785.97
Ctrl	2062.3	12.3692	265.845	6.00634	177.333	75.9291	450.716	78.0453	26.5342	139.747	1609.34	2919.63	1186.16	906.805	0.0769541	4048.23	8673.9	11.42	2943.3	5079.43
Ctrl	1753.47	10.517	250.616	6.94642	91.6428	131.661	470.168	41.0605	27.7417	119.595	1424.35	2764.58	953.354	571.76	0.0997831	3369.23	7657.72	21.6623	2750.78	6058.34
Ctrl	2109.23	12.8864	279.903	9.5796	141.436	152.521	431.265	52.9868	18.1747	170.948	1518.73	2504.26	1422.46	775.062	0.0769004	3443.57	8430.52	29.04	3281.51	4301.99
Ctrl	2065.47	13.7749	222.713	10.1024	181.22	96.6317	477.372	68.3077	29.2146	137.228	1658.42	2393.35	1371.25	946.139	0.0957544	3847.42	7855.94	19.4858	2504.49	3669.09
Ctrl	2483.38	13.1207	237.197	6.94642	114.223	152.206	359.943	80.234	28.3653	158.983	1331.05	2815.51	1239.13	1112.95	0.0827017	3961.7	8530.88	15.949	2601.61	5651.01
Ctrl	2395.87	13.8279	194.704	5.32047	177.498	124.104	385.158	41.0158	26.7333	173.009	1113.7	2661.58	981.873	873.159	0.094707	4093.72	8912.26	22.1744	2499.28	4347.98

## Sheet: Gait analysis
	limb	Group	NoGroup	Gaitspeed	Swing	Brake	Propel	Stance	Stride	StrideLength	StrideFrequency	Steps	Pawarea	PawAreaVar
73	LF	Ctrl	1	14.6	0.101	0.091	0.179	0.27	0.371	5.4	2.8	14.5	0.26	0.03
74	LF	Ctrl	1	16.1	0.127	0.093	0.124	0.217	0.344	5.5	2.9	20	0.13	0.03
75	LF	Ctrl	1	19.2	0.104	0.088	0.12	0.208	0.312	6	3.3	23.5	0.25	0.03
76	LF	Ctrl	1	19.2	0.113	0.059	0.158	0.217	0.363	6.2	2.8	15.5	0.17	0.01
77	LF	Ctrl	1	18	0.095	0.078	0.138	0.215	0.311	5.6	3.3	16.5	0.18	0.03
78	LF	Ctrl	1	16.9	0.095	0.102	0.161	0.263	0.358	6	2.9	12	0.2	0.02
79	LF	Ctrl	1	20	0.092	0.078	0.142	0.22	0.312	6.2	3.3	16.5	0.25	0.01
80	LF	Ctrl	1	17	0.101	0.108	0.136	0.244	0.345	5.9	3	13	0.29	0.03
81	LF	Ctrl	1	16.9	0.109	0.098	0.16	0.258	0.367	6.2	2.7	14	0.25	0.04
82	LF	Ctrl	1	17.9	0.113	0.076	0.145	0.221	0.334	6	3.1	16	0.27	0.02
83	LF	Ctrl	1	18.1	0.078	0.084	0.125	0.209	0.287	5.2	3.6	17	0.19	0.03
84	LH	Ctrl	2	14.6	0.096	0.055	0.219	0.274	0.392	5.7	2.6	15.5	0.56	0.02
85	LH	Ctrl	2	16.1	0.08	0.038	0.2	0.238	0.318	5.1	3.2	22	0.56	0.04
86	LH	Ctrl	2	19.2	0.074	0.051	0.171	0.222	0.296	5.7	3.5	24.5	0.57	0.05
87	LH	Ctrl	2	19.2	0.088	0.035	0.205	0.239	0.327	6.3	3.1	17	0.48	0.03
88	LH	Ctrl	2	18	0.079	0.059	0.193	0.252	0.33	5.9	3.1	16	0.52	0.03
89	LH	Ctrl	2	16.9	0.086	0.064	0.214	0.278	0.364	6.2	2.8	12	0.57	0.05
90	LH	Ctrl	2	20	0.106	0.043	0.166	0.21	0.315	6.3	3.2	22	0.56	0.04
91	LH	Ctrl	2	17	0.082	0.067	0.206	0.273	0.356	6	2.9	12.5	0.63	0.03
92	LH	Ctrl	2	16.9	0.096	0.07	0.2	0.27	0.366	6.2	2.8	14.5	0.56	0.04
93	LH	Ctrl	2	17.9	0.092	0.055	0.179	0.234	0.326	5.8	3.2	15.5	0.52	0.03
94	LH	Ctrl	2	18.1	0.073	0.03	0.182	0.212	0.285	5.2	3.6	17	0.47	0.03
95	RF	Ctrl	3	14.6	0.12	0.113	0.168	0.281	0.375	6.5	2.3	13	0.27	0.01
96	RF	Ctrl	3	16.1	0.112	0.081	0.129	0.211	0.364	5.9	2.8	18.5	0.14	0.04
97	RF	Ctrl	3	19.2	0.094	0.075	0.131	0.206	0.299	5.7	3.4	24.5	0.26	0.03
98	RF	Ctrl	3	19.2	0.105	0.066	0.154	0.22	0.325	6.2	3.2	16.5	0.18	0.03
99	RF	Ctrl	3	18	0.12	0.065	0.143	0.209	0.329	5.9	3.1	16	0.18	0.03
100	RF	Ctrl	3	16.9	0.109	0.098	0.161	0.259	0.368	6.2	2.8	11.5	0.23	0.02
101	RF	Ctrl	3	20	0.094	0.049	0.174	0.223	0.317	6.3	3.2	22	0.27	0.01
102	RF	Ctrl	3	17	0.112	0.084	0.145	0.229	0.341	5.8	3	10.5	0.3	0.02
103	RF	Ctrl	3	16.9	0.115	0.099	0.161	0.26	0.375	6.3	2.7	14	0.27	0.03
104	RF	Ctrl	3	17.9	0.105	0.061	0.141	0.202	0.307	5.5	3.3	17	0.28	0.02
105	RF	Ctrl	3	18.1	0.083	0.056	0.145	0.201	0.284	5.1	3.6	17.5	0.22	0.03
106	RH	Ctrl	4	14.6	0.092	0.088	0.208	0.296	0.388	5.7	2.6	15	0.67	0.03
107	RH	Ctrl	4	16.1	0.071	0.047	0.217	0.264	0.335	5.4	3.1	20.5	0.37	0.03
108	RH	Ctrl	4	19.2	0.071	0.06	0.164	0.224	0.295	5.7	3.5	24.5	0.6	0.04
109	RH	Ctrl	4	19.2	0.075	0.036	0.214	0.25	0.326	6.3	3.1	17	0.49	0.02
110	RH	Ctrl	4	18	0.068	0.058	0.183	0.241	0.309	5.6	3.4	16.5	0.48	0.04
111	RH	Ctrl	4	16.9	0.088	0.077	0.201	0.278	0.366	6.2	2.8	12	0.53	0.05
112	RH	Ctrl	4	20	0.112	0.033	0.173	0.206	0.318	6.4	3.2	22	0.5	0.04
113	RH	Ctrl	4	17	0.088	0.07	0.191	0.261	0.35	5.9	2.9	13.5	0.72	0.04
114	RH	Ctrl	4	16.9	0.093	0.055	0.217	0.272	0.366	6.2	2.8	14	0.62	0.04
115	RH	Ctrl	4	17.9	0.09	0.046	0.193	0.239	0.328	5.9	3.1	16.5	0.59	0.03
116	RH	Ctrl	4	18.1	0.071	0.061	0.153	0.213	0.284	5.1	3.6	17.5	0.54	0.04
117	LF	Mod	5	12	0.107	0.09	0.225	0.315	0.422	5.1	2.4	15	0.38	0.04
118	LF	Mod	5	16	0.1	0.136	0.161	0.296	0.396	4.8	2.6	18.5	0.23	0.03
119	LF	Mod	5	16	0.111	0.153	0.096	0.248	0.359	5.8	2.8	10.5	0.12	0.03
120	LF	Mod	5	12.8	0.107	0.086	0.156	0.243	0.35	4.5	2.9	21.5	0.23	0.04
121	LF	Mod	5	12	0.103	0.123	0.164	0.288	0.39	4.7	2.7	16.5	0.23	0.03
122	LF	Mod	5	16	0.085	0.056	0.174	0.23	0.315	5	3.3	11.5	0.18	0.02
123	LF	Mod	5	8.8	0.114	0.108	0.261	0.369	0.483	4.2	2.1	14	0.27	0.03
124	LF	Mod	5	10.1	0.096	0.108	0.125	0.233	0.329	4.6	3.1	17	0.21	0.04
125	LF	Mod	5	10.2	0.099	0.145	0.204	0.349	0.448	4.6	2.3	12	0.31	0.03
126	LF	Mod	5	10.9	0.111	0.118	0.158	0.276	0.443	4.8	2.3	12	0.21	0.02
127	LF	Mod	5	10.9	0.125	0.1	0.212	0.311	0.436	4.8	2.3	12	0.22	0.04
128	LF	Mod	5	10.5	0.14	0.127	0.189	0.316	0.457	4.8	2.2	15	0.2	0.03
129	LH	Mod	6	12	0.086	0.061	0.278	0.339	0.425	5.1	2.4	15.5	0.65	0.06
130	LH	Mod	6	16	0.14	0.03	0.228	0.258	0.398	6.4	2.6	19	0.81	0.05
131	LH	Mod	6	16	0.121	0.046	0.204	0.25	0.371	5.9	2.8	10.5	0.6	0.05
132	LH	Mod	6	12.8	0.092	0.055	0.216	0.271	0.363	4.6	2.8	20	0.57	0.05
133	LH	Mod	6	12	0.104	0.062	0.254	0.316	0.42	5	2.4	15.5	0.61	0.06
134	LH	Mod	6	16	0.086	0.047	0.215	0.262	0.348	5.6	3	11.5	0.55	0.05
135	LH	Mod	6	8.8	0.118	0.091	0.324	0.415	0.533	4.7	1.9	12.5	0.66	0.06
136	LH	Mod	6	10.1	0.089	0.08	0.297	0.378	0.467	4.7	2.2	12	0.6	0.03
137	LH	Mod	6	10.2	0.085	0.073	0.289	0.362	0.447	4.6	2.3	12	0.7	0.06
138	LH	Mod	6	10.9	0.093	0.05	0.265	0.315	0.408	4.5	2.5	12.5	0.51	0.04
139	LH	Mod	6	10.9	0.11	0.058	0.296	0.354	0.465	5.1	2.2	10.5	0.52	0.05
140	LH	Mod	6	10.5	0.086	0.093	0.23	0.323	0.409	4.3	2.5	16.5	0.56	0.04
141	RF	Mod	7	12	0.107	0.078	0.217	0.295	0.472	5.7	2.2	14.5	0.2	0.03
142	RF	Mod	7	16	0.101	0.099	0.197	0.296	0.397	6.3	2.5	15.5	0.23	0.02
143	RF	Mod	7	16	0.1	0.073	0.193	0.266	0.366	5.9	2.8	10.5	0.23	0.02
144	RF	Mod	7	12.8	0.096	0.085	0.167	0.251	0.347	4.4	2.9	21.5	0.23	0.03
145	RF	Mod	7	12	0.086	0.085	0.149	0.234	0.32	3.8	3.2	20.5	0.25	0.02
146	RF	Mod	7	16	0.089	0.065	0.149	0.214	0.304	4.9	3.4	13	0.19	0.02
147	RF	Mod	7	8.8	0.107	0.101	0.224	0.299	0.521	4.6	2	13.5	0.25	0.03
148	RF	Mod	7	10.1	0.109	0.1	0.176	0.276	0.385	3.9	2.6	13.5	0.23	0.02
149	RF	Mod	7	10.2	0.108	0.116	0.224	0.34	0.447	4.6	2.3	12.5	0.29	0.03
150	RF	Mod	7	10.9	0.144	0.088	0.196	0.285	0.429	4.7	2.3	12	0.23	0.02
151	RF	Mod	7	10.9	0.125	0.125	0.217	0.342	0.466	5.1	2.2	10.5	0.25	0.02
152	RF	Mod	7	10.5	0.084	0.112	0.187	0.299	0.383	4	2.6	18	0.2	0.03
153	RH	Mod	8	12	0.086	0.058	0.279	0.337	0.423	5.1	2.4	15.5	0.72	0.05
154	RH	Mod	8	16	0.102	0.043	0.242	0.285	0.436	4.7	2.4	17.5	0.7	0.12
155	RH	Mod	8	16	0.125	0.051	0.175	0.225	0.351	5.6	2.9	11	0.51	0.07
156	RH	Mod	8	12.8	0.078	0.095	0.176	0.271	0.349	4.5	2.9	21.5	0.58	0.08
157	RH	Mod	8	12	0.091	0.093	0.204	0.296	0.388	4.7	2.6	17	0.67	0.08
158	RH	Mod	8	16	0.087	0.048	0.209	0.257	0.344	5.5	3	10.5	0.57	0.03
159	RH	Mod	8	8.8	0.103	0.108	0.325	0.434	0.537	4.7	1.9	13	0.64	0.04
160	RH	Mod	8	10.1	0.102	0.074	0.268	0.343	0.445	4.5	2.3	12.5	0.63	0.07
161	RH	Mod	8	10.2	0.08	0.074	0.298	0.372	0.452	4.6	2.3	12.5	0.7	0.04
162	RH	Mod	8	10.9	0.094	0.069	0.243	0.312	0.406	4.4	2.5	13	0.54	0.03
163	RH	Mod	8	10.9	0.095	0.095	0.271	0.366	0.461	5	2.2	11	0.51	0.03
164	RH	Mod	8	10.5	0.089	0.118	0.228	0.346	0.435	4.6	2.4	15.5	0.51	0.06
165	LF	Mus	9	16	0.107	0.101	0.172	0.318	0.367	5.5	3	8.5	0.22	0.02
166	LF	Mus	9	16.4	0.102	0.106	0.131	0.238	0.367	6	2.8	14	0.21	0.02
167	LF	Mus	9	17.9	0.102	0.078	0.112	0.19	0.291	5.2	3.5	18.5	0.21	0.03
168	LF	Mus	9	18.6	0.083	0.1	0.13	0.23	0.313	5.8	3.2	14.5	0.28	0.02
169	LF	Mus	9	14.6	0.096	0.086	0.19	0.276	0.372	5.4	2.8	14.5	0.23	0.02
170	LF	Mus	9	18	0.097	0.077	0.138	0.215	0.313	5.6	3.3	18	0.2	0.03
171	LF	Mus	9	14	0.108	0.13	0.15	0.28	0.388	5.4	2.6	11	0.22	0.04
172	LF	Mus	9	19.4	0.092	0.08	0.131	0.211	0.303	5.9	3.3	17	0.22	0.04
173	LF	Mus	9	18	0.103	0.081	0.163	0.244	0.347	6.3	2.9	12.5	0.19	0.01
174	LF	Mus	9	13.6	0.107	0.142	0.172	0.329	0.436	5.9	2.3	11	0.25	0.02
175	LF	Mus	9	16.6	0.097	0.082	0.165	0.247	0.344	5.7	3	12	0.21	0.02
176	LF	Mus	9	11.6	0.08	0.142	0.142	0.285	0.365	5.4	2.8	12.5	0.27	0.02
177	LF	Mus	9	16.6	0.113	0.106	0.114	0.22	0.333	5.5	3	15.5	0.26	0.03
178	LH	Mus	10	16	0.078	0.05	0.206	0.256	0.368	5.9	2.7	13	0.51	0.06
179	LH	Mus	10	16.4	0.083	0.071	0.217	0.288	0.371	6.1	2.8	14.5	0.62	0.08
180	LH	Mus	10	17.9	0.078	0.068	0.196	0.264	0.342	6.1	3	16	0.52	0.07
181	LH	Mus	10	18.6	0.078	0.04	0.199	0.239	0.317	5.9	3.3	14.5	0.51	0.05
182	LH	Mus	10	14.6	0.088	0.054	0.229	0.283	0.371	5.4	2.8	14.5	0.51	0.03
183	LH	Mus	10	18	0.083	0.039	0.194	0.233	0.316	5.7	3.2	18.5	0.49	0.03
184	LH	Mus	10	14	0.081	0.074	0.233	0.307	0.388	5.4	2.7	11.5	0.43	0.04
185	LH	Mus	10	19.4	0.083	0.052	0.173	0.225	0.307	6	3.3	17	0.42	0.02
186	LH	Mus	10	18	0.101	0.058	0.202	0.26	0.361	6.5	2.9	12.5	0.5	0.02
187	LH	Mus	10	13.6	0.102	0.077	0.229	0.337	0.402	6	2.3	11.5	0.6	0.06
188	LH	Mus	10	16.6	0.084	0.062	0.208	0.27	0.354	5.9	2.9	11.5	0.51	0.03
189	LH	Mus	10	11.6	0.089	0.068	0.209	0.312	0.402	5.4	2.6	11.5	0.6	0.03
190	LH	Mus	10	16.6	0.091	0.054	0.194	0.247	0.338	5.6	3.1	15.5	0.62	0.03
191	RF	Mus	11	16	0.151	0.122	0.154	0.277	0.428	6.8	2.4	11	0.22	0.02
192	RF	Mus	11	16.4	0.127	0.119	0.15	0.269	0.396	6.5	2.6	13.5	0.24	0.02
193	RF	Mus	11	17.9	0.106	0.089	0.144	0.233	0.339	6.1	3	16	0.25	0.03
194	RF	Mus	11	18.6	0.133	0.08	0.15	0.231	0.364	6.8	2.8	12.5	0.29	0.01
195	RF	Mus	11	14.6	0.095	0.068	0.209	0.278	0.373	5.4	2.7	15	0.24	0.02
196	RF	Mus	11	18	0.102	0.082	0.13	0.213	0.315	5.7	3.3	18.5	0.21	0.02
197	RF	Mus	11	14	0.131	0.087	0.165	0.252	0.383	5.4	2.7	11	0.2	0.03
198	RF	Mus	11	19.4	0.102	0.093	0.109	0.202	0.305	5.9	3.4	17	0.19	0.03
199	RF	Mus	11	18	0.099	0.059	0.178	0.237	0.336	6	3.1	13.5	0.2	0.02
200	RF	Mus	11	13.6	0.097	0.106	0.198	0.305	0.401	5.5	2.5	12.5	0.27	0.02
201	RF	Mus	11	16.6	0.105	0.074	0.174	0.248	0.353	5.9	2.9	11.5	0.21	0.03
202	RF	Mus	11	11.6	0.113	0.108	0.182	0.289	0.402	4.7	2.5	11.5	0.26	0.01
203	RF	Mus	11	16.6	0.113	0.107	0.115	0.222	0.335	5.6	3	15.5	0.28	0.02
204	RH	Mus	12	16	0.105	0.045	0.212	0.257	0.362	5.8	2.9	13.5	0.64	0.05
205	RH	Mus	12	16.4	0.079	0.047	0.217	0.291	0.37	6.1	2.7	14.5	0.52	0.07
206	RH	Mus	12	17.9	0.074	0.047	0.218	0.265	0.338	6.1	3.1	15.5	0.54	0.04
207	RH	Mus	12	18.6	0.107	0.039	0.193	0.231	0.338	6.3	3	13	0.45	0.05
208	RH	Mus	12	14.6	0.087	0.057	0.23	0.287	0.375	5.5	2.7	15	0.58	0.04
209	RH	Mus	12	18	0.071	0.041	0.204	0.245	0.316	5.7	3.3	18.5	0.45	0.03
210	RH	Mus	12	14	0.086	0.046	0.204	0.314	0.4	5.6	2.6	10.5	0.43	0.02
211	RH	Mus	12	19.4	0.075	0.046	0.189	0.2	0.338	5.3	2.9	18.5	0.42	0.05
212	RH	Mus	12	18	0.084	0.056	0.215	0.271	0.356	6.4	2.9	12.5	0.51	0.02
213	RH	Mus	12	13.6	0.091	0.057	0.23	0.338	0.429	5.8	2.3	11.5	0.6	0.04
214	RH	Mus	12	16.6	0.088	0.056	0.189	0.265	0.353	5.9	2.9	12	0.54	0.03
215	RH	Mus	12	11.6	0.094	0.056	0.214	0.31	0.404	5.7	2.5	11.5	0.62	0.02
216	RH	Mus	12	16.6	0.088	0.056	0.191	0.247	0.335	5.6	3.1	15	0.67	0.05

## Sheet: TST
SubjectName	Group	No.	ImmobilityDurationTotal.s	ImmobilityDurationTotalPer	ImmobilityMeanDuration.s
2022-01-02	Mod	1	0	0	0
2022-01-03	Mod	1	45.6	12.67	1.63
2022-01-04	Mod	1	9.42	2.62	1.05
2022-01-05	Mod	1	23.08	6.41	0.92
2022-01-06	Mod	1	82.43	22.9	1.27
2022-01-07	Mod	1	14.55	4.04	0.45
2022-02-03	Mod	1	96.04	26.68	1.75
2022-02-04	Mod	1	17.05	4.74	0.95
2022-02-05	Mod	1	100.48	27.91	1.4
2022-03-01	Mus	2	91.12	25.31	1.21
2022-03-02	Mus	2	77.28	21.47	1.43
2022-03-03	Mus	2	84.6	23.5	1.66
2022-03-04	Mus	2	0.38	0.1	0.38
2022-03-07	Mus	2	0.08	0.02	0.08
2022-04-01	Mus	2	96.48	26.8	2.24
2022-04-02	Mus	2	1.64	0.46	0.33
2022-04-03	Mus	2	0.24	0.07	0.24
2022-04-04	Mus	2	143.85	39.96	2.52
2022-04-05	Mus	2	78.24	21.73	1.15
2022-04-06	Mus	2	4.8	1.33	1.6
2022-09-01	Ctrl	5	127.52	35.42	3.04
2022-09-02	Ctrl	5	74.48	20.69	1.52
2022-09-03	Ctrl	5	129.12	35.87	2.75
2022-09-04	Ctrl	5	69.64	19.34	2.05
2022-09-05	Ctrl	5	170.96	47.49	2.59
2022-09-06	Ctrl	5	77.03	21.4	1.6
2022-10-01	Ctrl	5	19	5.28	0.4
2022-10-02	Ctrl	5	88.76	24.66	1.39
2022-10-03	Ctrl	5	112.58	31.27	2.45
2022-10-04	Ctrl	5	134.22	37.28	1.4
2022-10-05	Ctrl	5	34.63	9.62	0.63
2022-10-06	Ctrl	5	70.5	19.58	0.89

[truncated: 1 more sheets: OFT]
